# Supplementary material for: Inhibition of TNBC Cell Growth by Paroxetine: Induction of Apoptosis and Blockage of Autophagy Flux
Source: MDPI journal article supplement (doi:10.3390/cancers16050885), 2024-02-22

**Fig.2K. The effect of different concentration of PX on expression levels of apoptosis related protein in 4T1 and MDA-MB-231 cells**

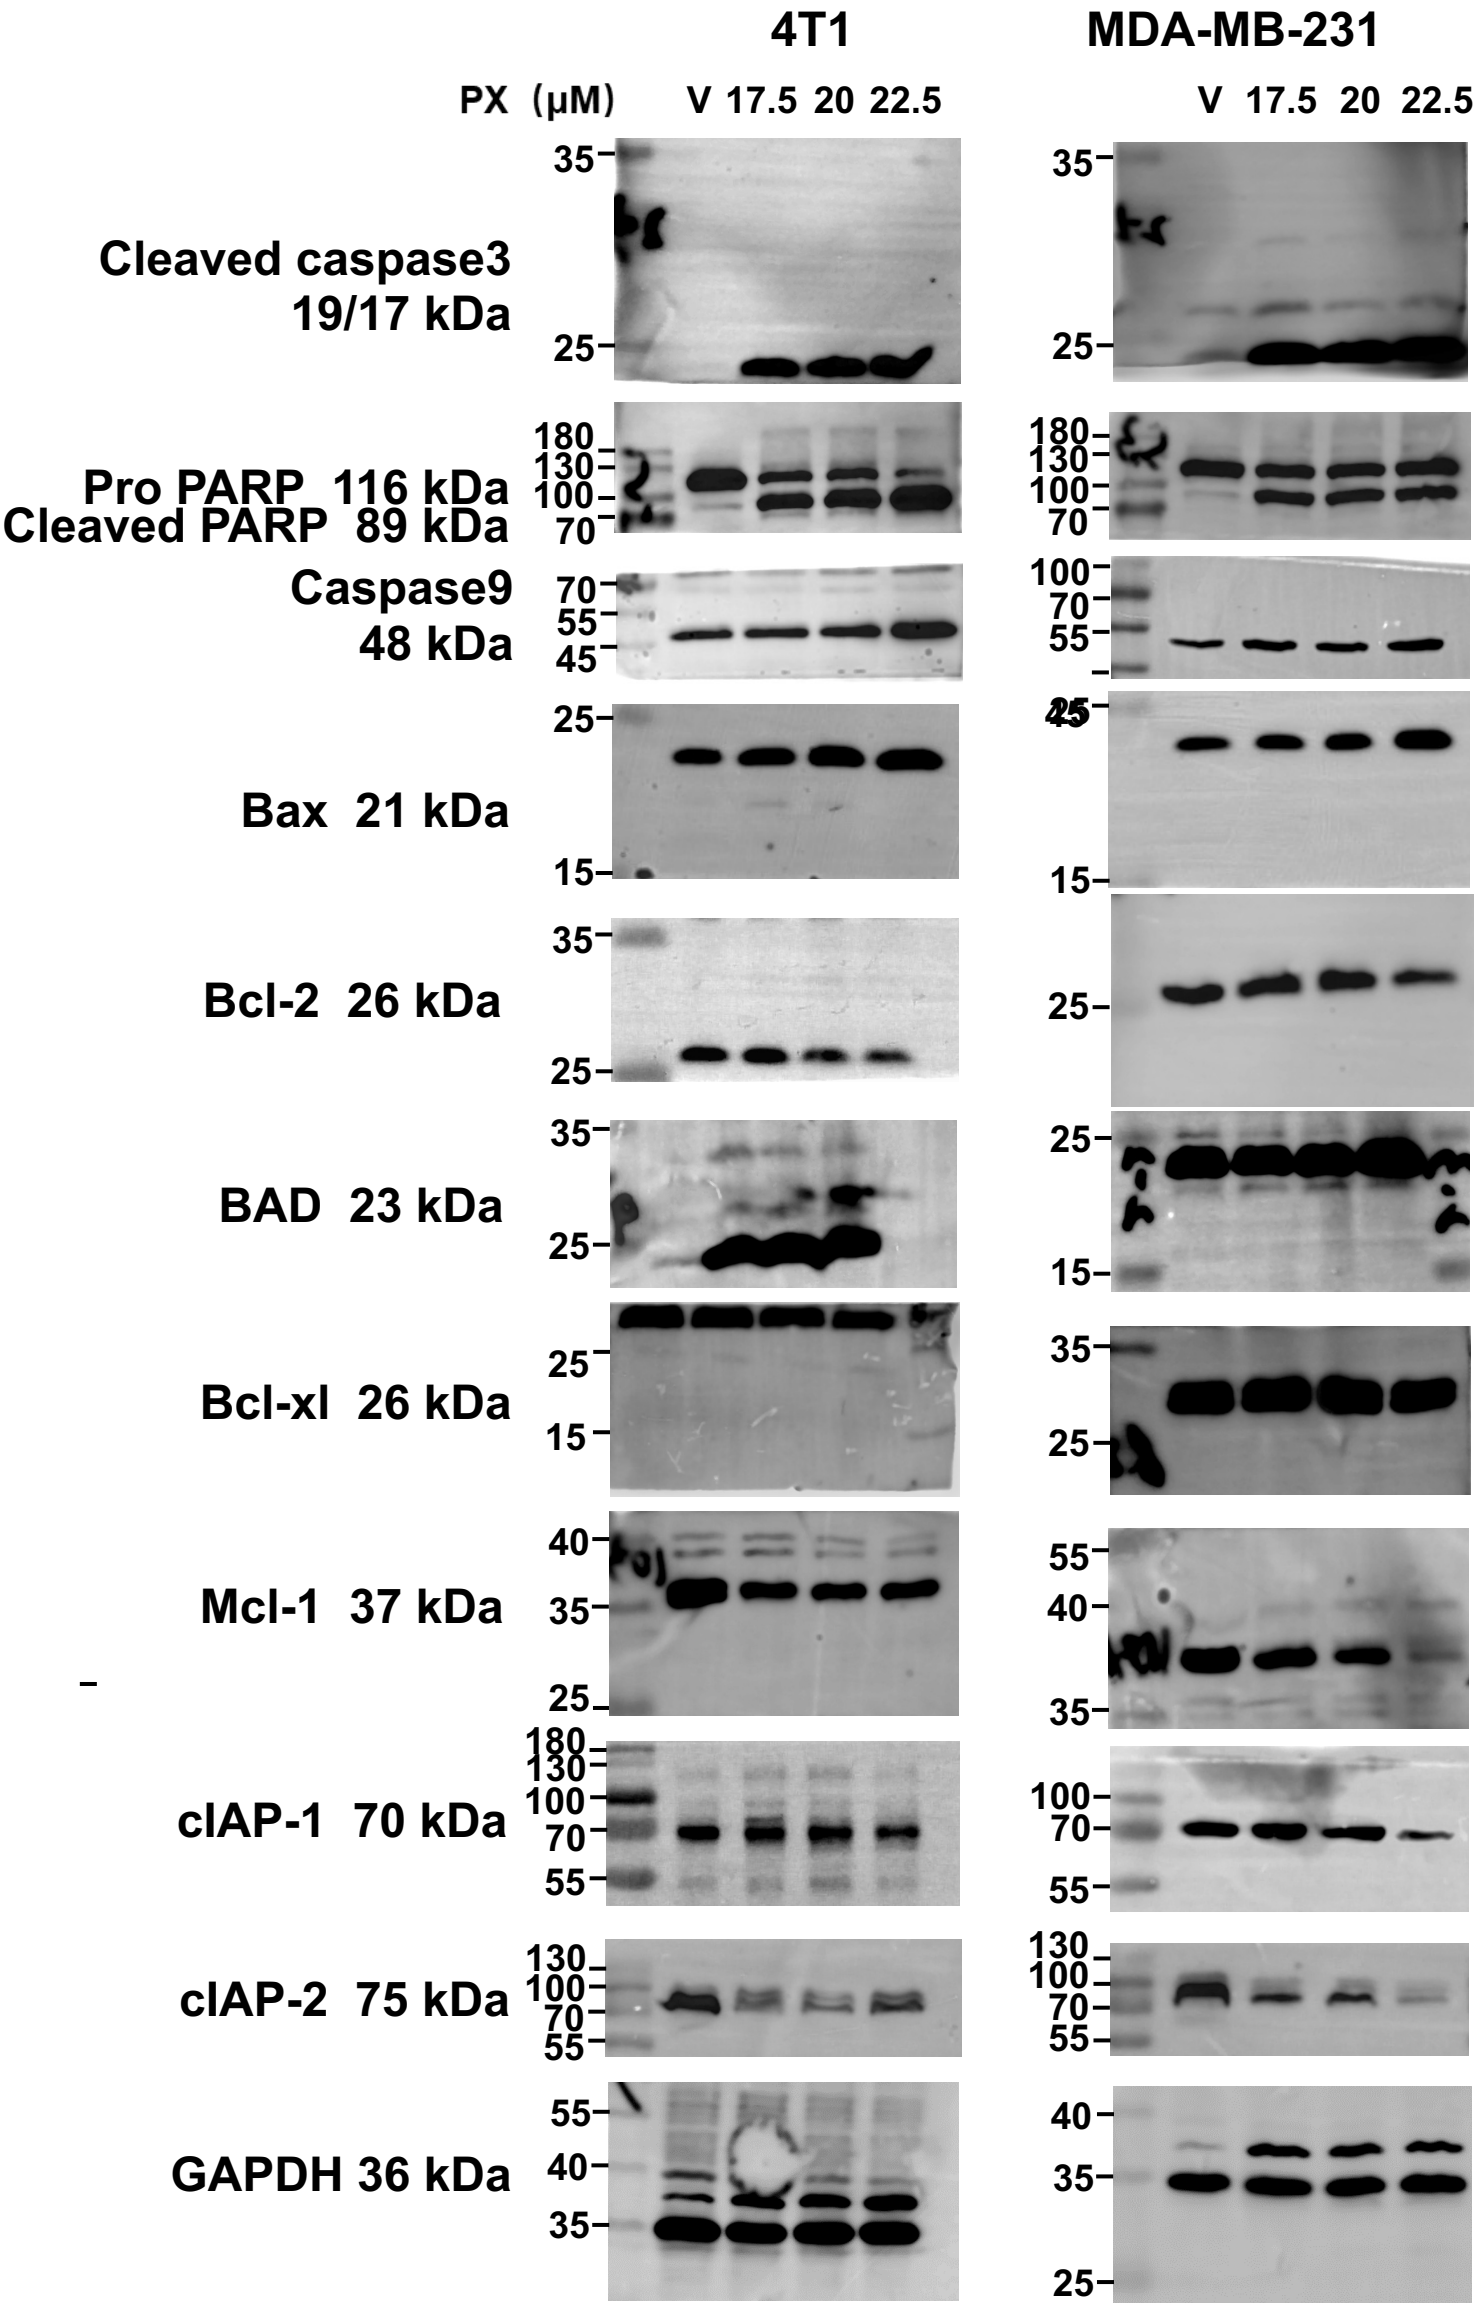

**Fig. 3D. The effect of different concentration of PX on expression levels of autophapy related-protein AKT in 4T1, MDA-MB-231 cells**

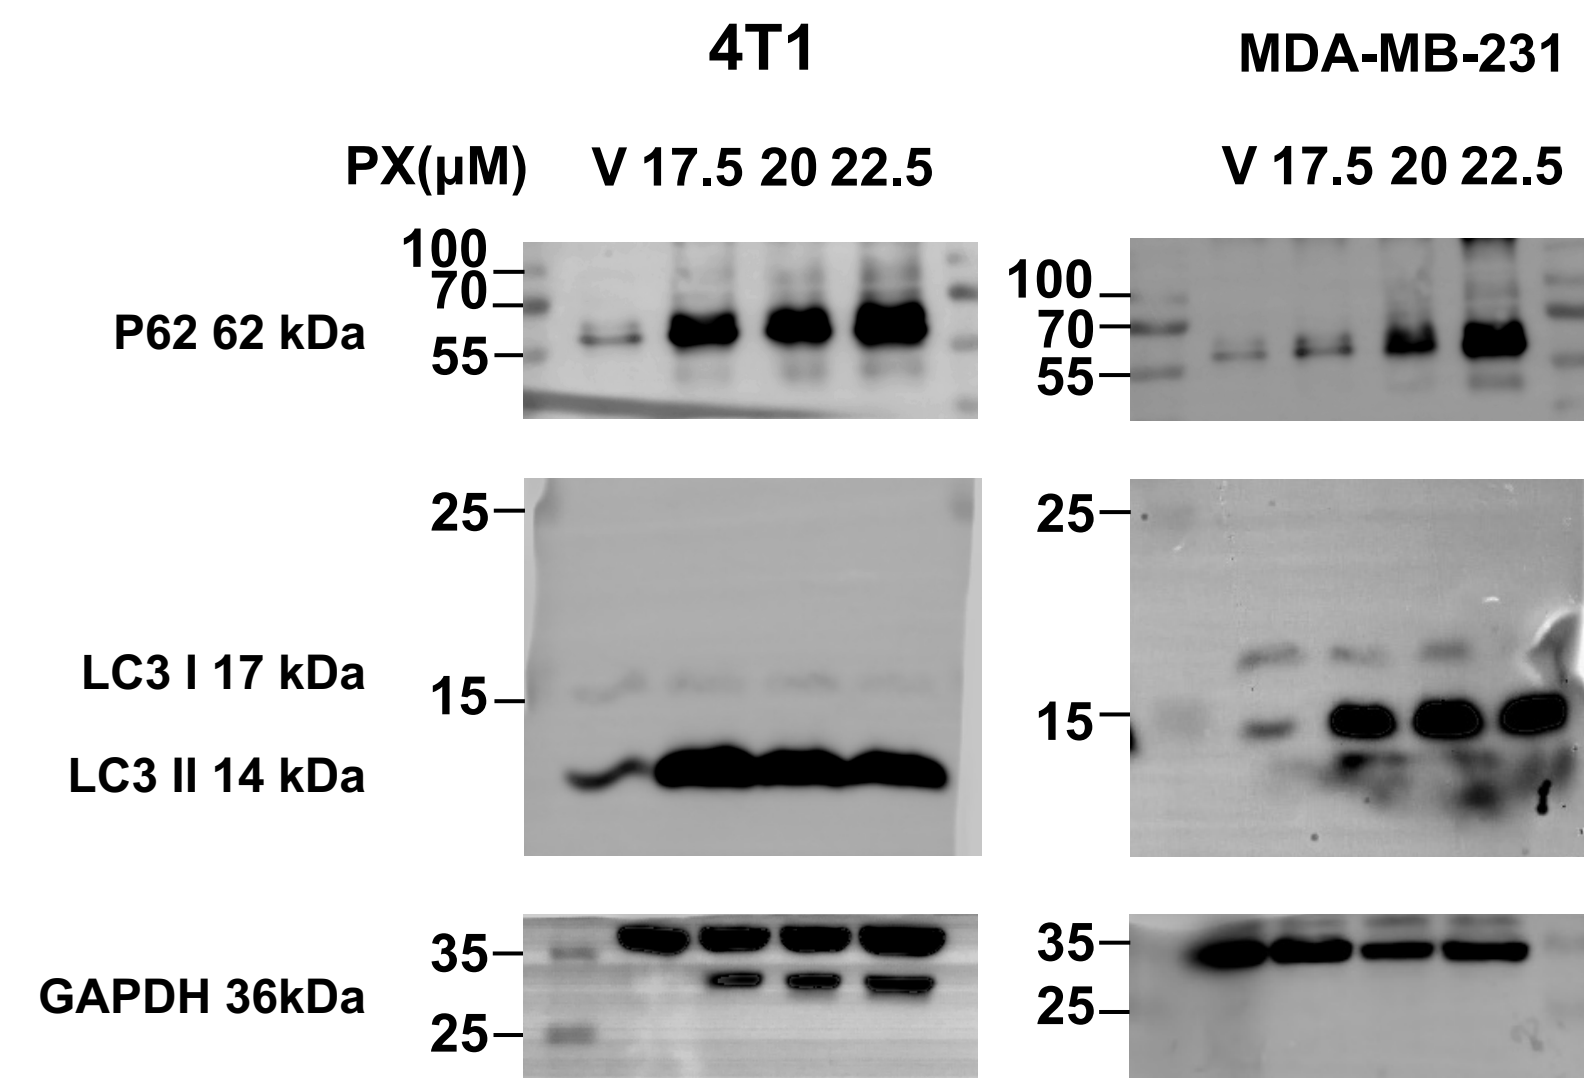

**Fig. 4D. The effect of different concentration of PX on expression levels of pathway related-protein AKT in 4T1, MDA-MB-231 cells**

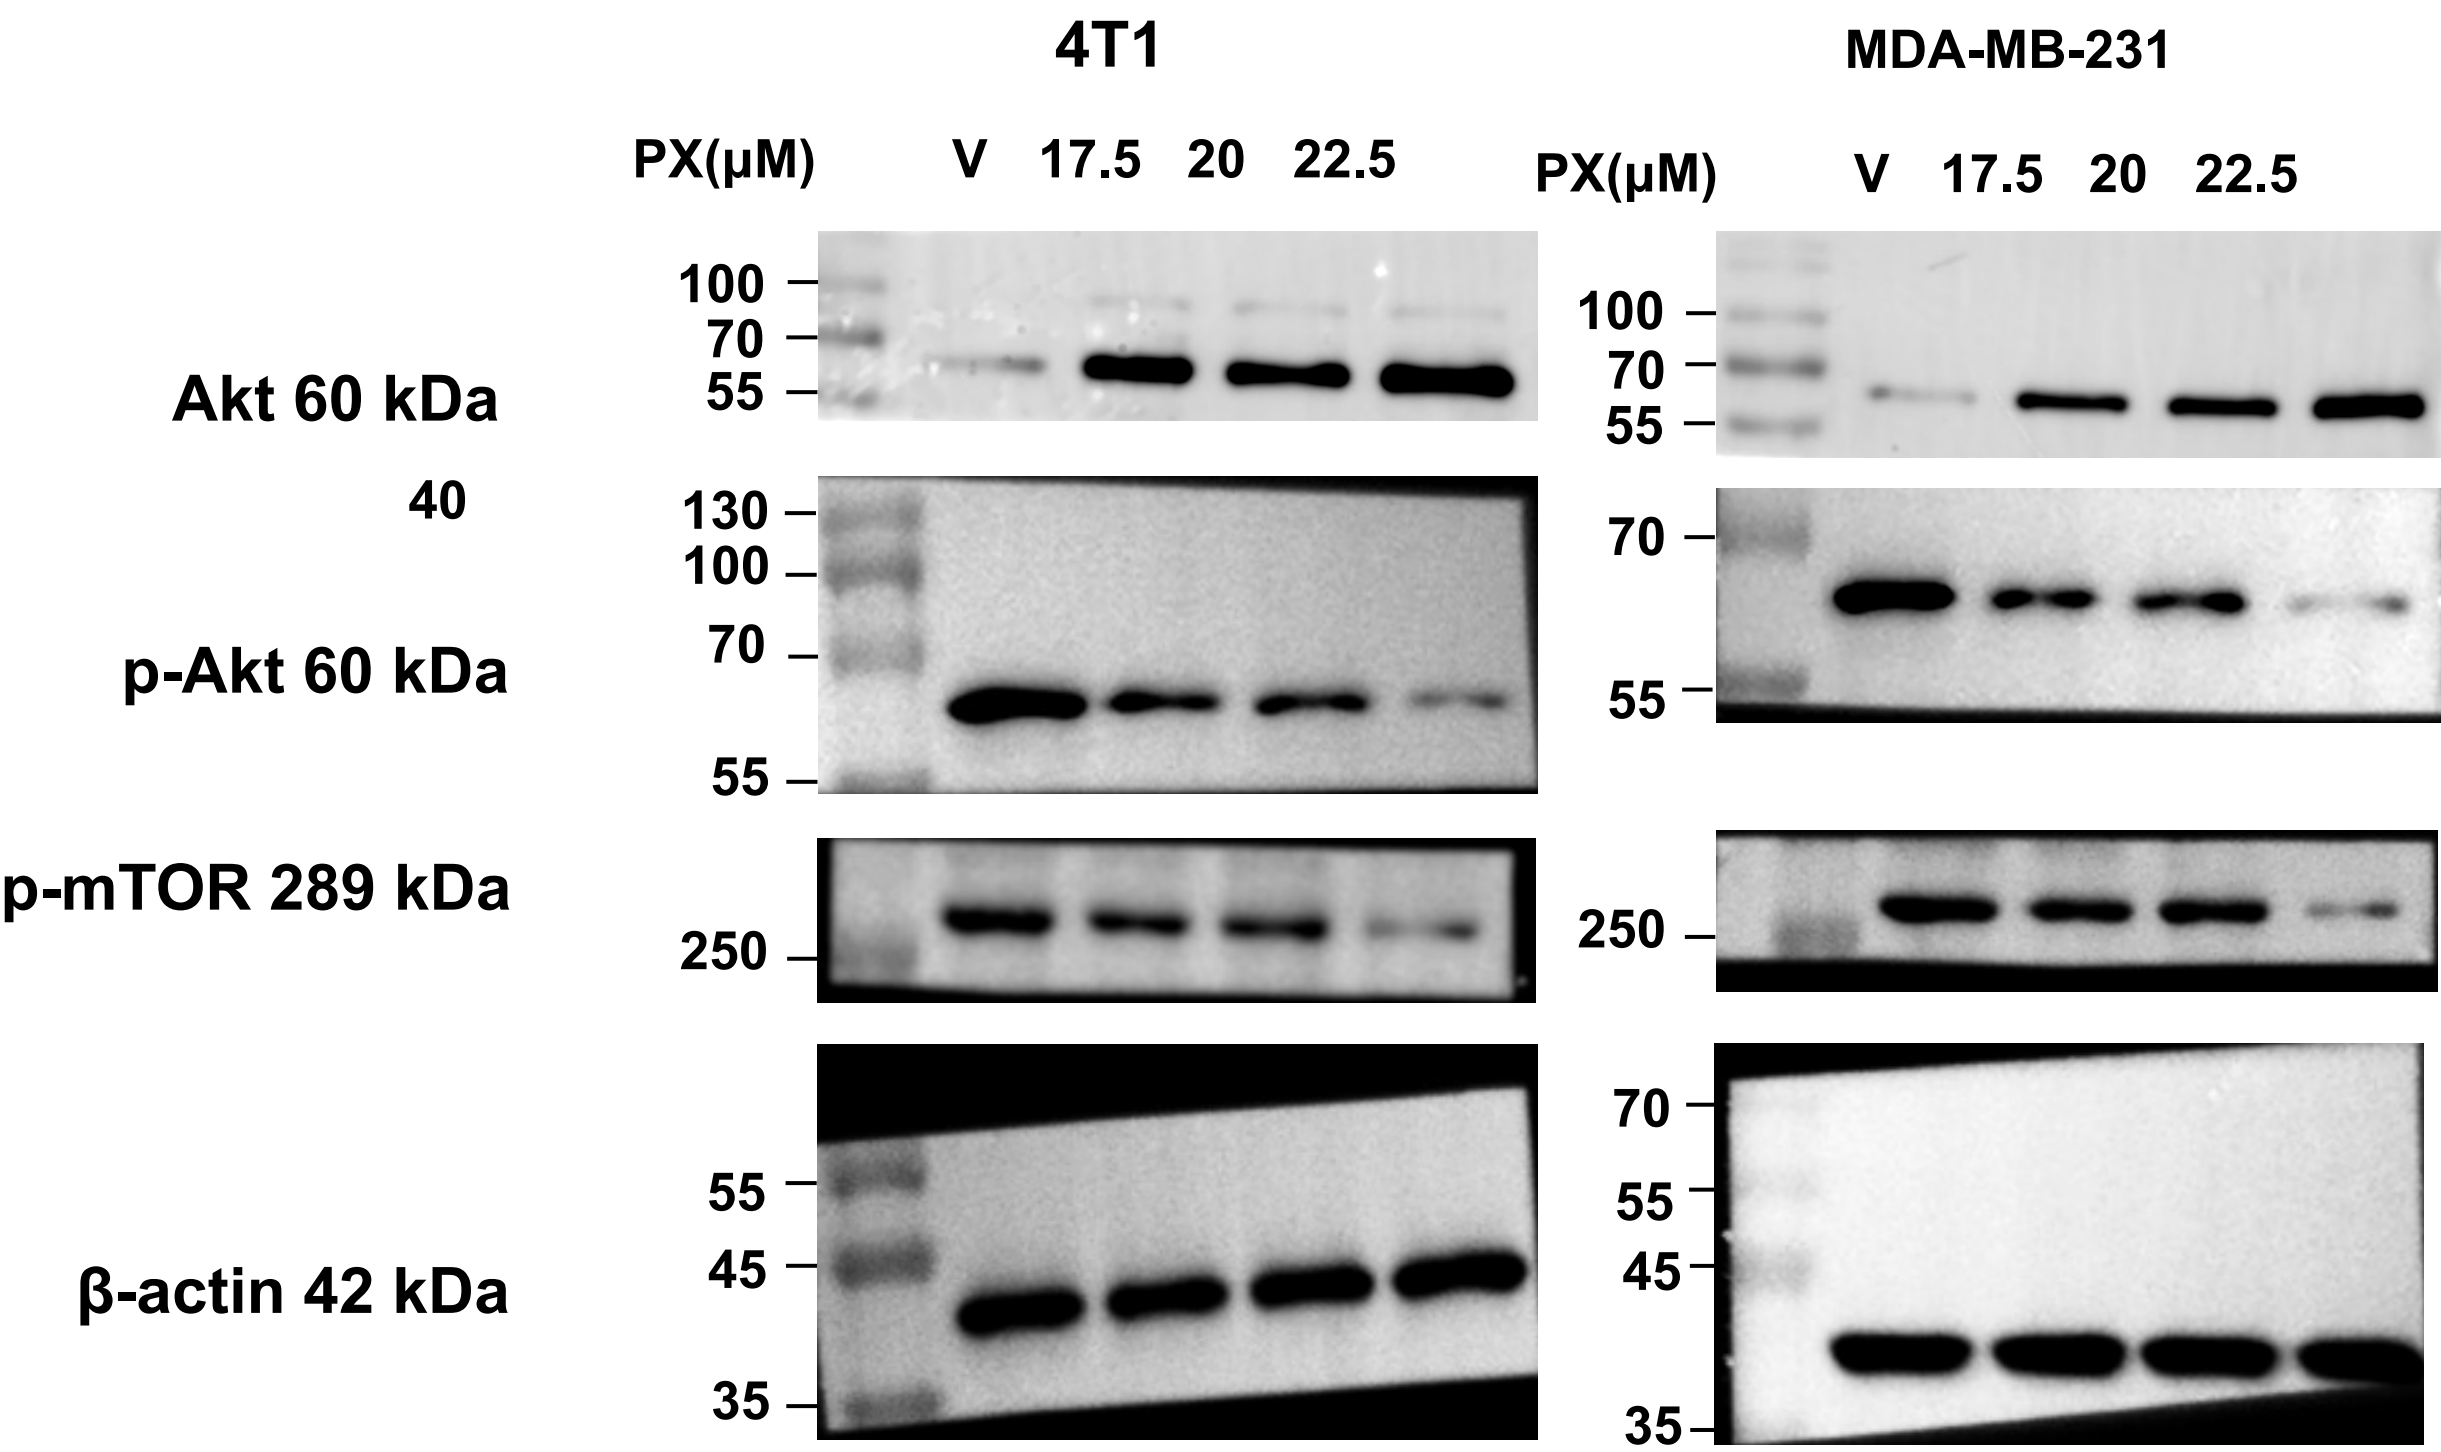

Supplement: s1 [file s1]
